# Supplementary material
Source: publisher site journal article supplement (https://www.dovepress.com/article/443981)
Supplement: Supplementary file 1 [file get_supplementary_file.php]

Supplementary Figure 1: Timetable of week 1. Blue boxes represent theoretical sessions, pink boxes indicate Hands-On sessions, orange boxes represent on-site events, green boxes specify blended learning assignments and brown boxes depict a summary of the overall aim of the day.


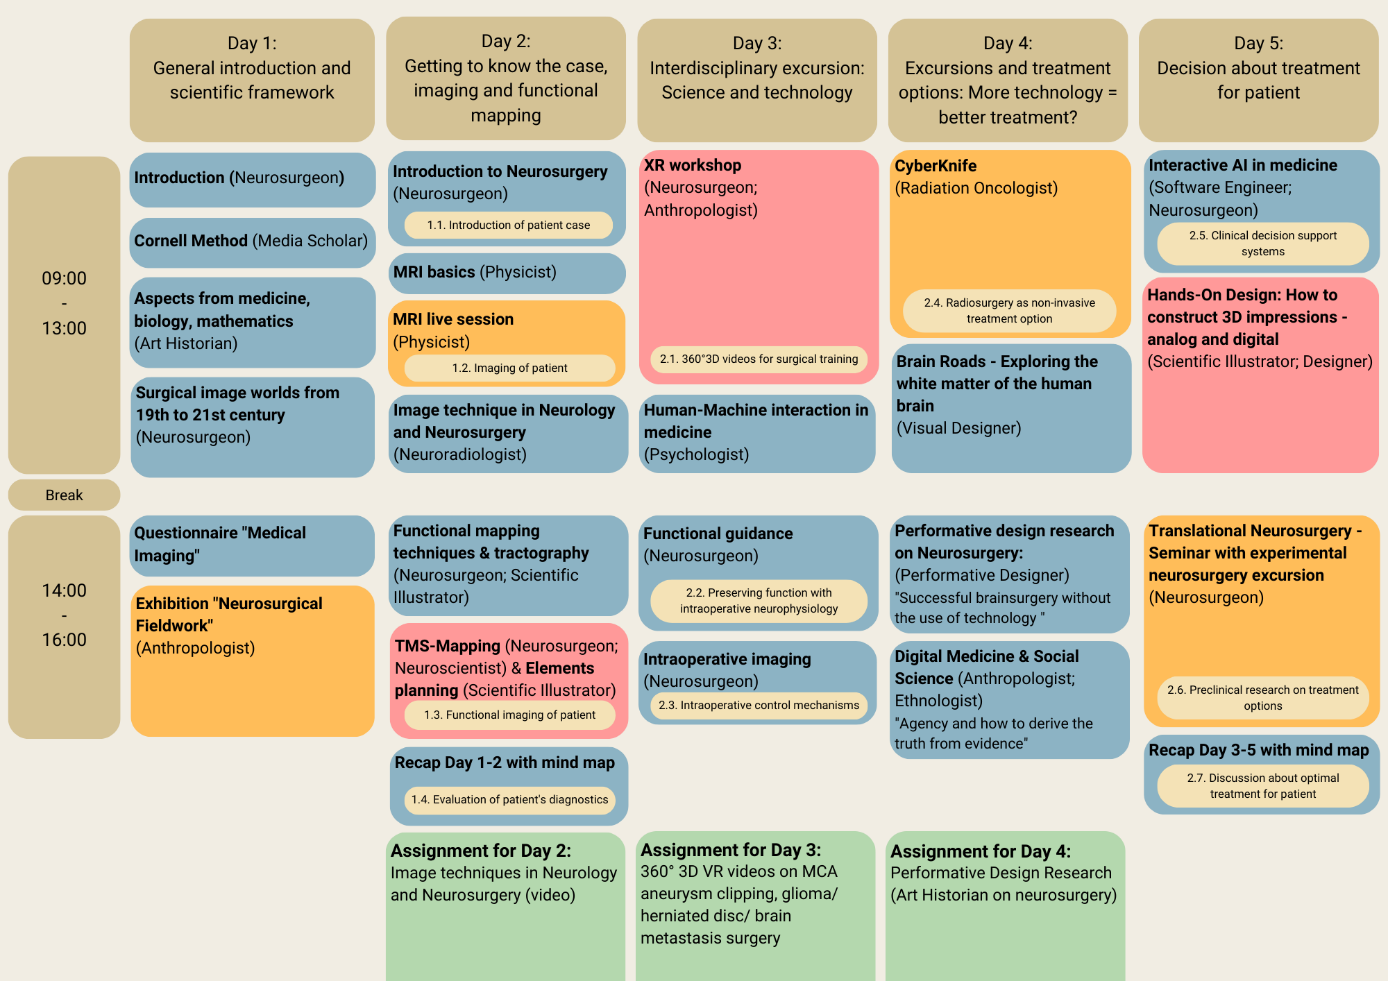


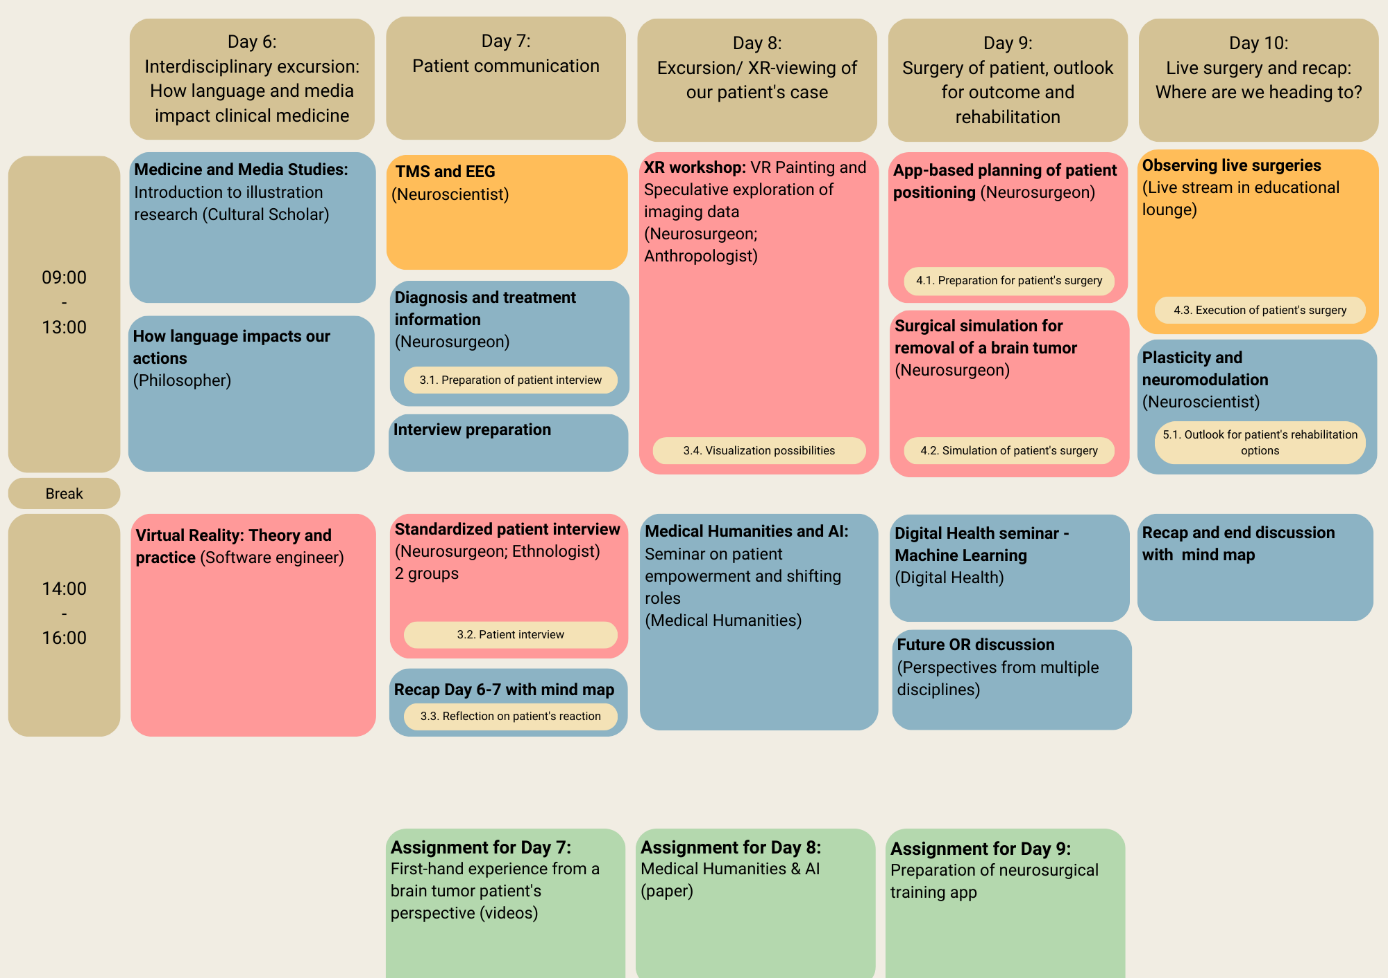
Supplementary Figure 2: Timetable of week 2. Blue boxes represent theoretical sessions, pink boxes indicate Hands-On sessions, orange boxes represent on-site events, green boxes specify blended learning assignments and brown boxes depict a summary of the overall aim of the day.


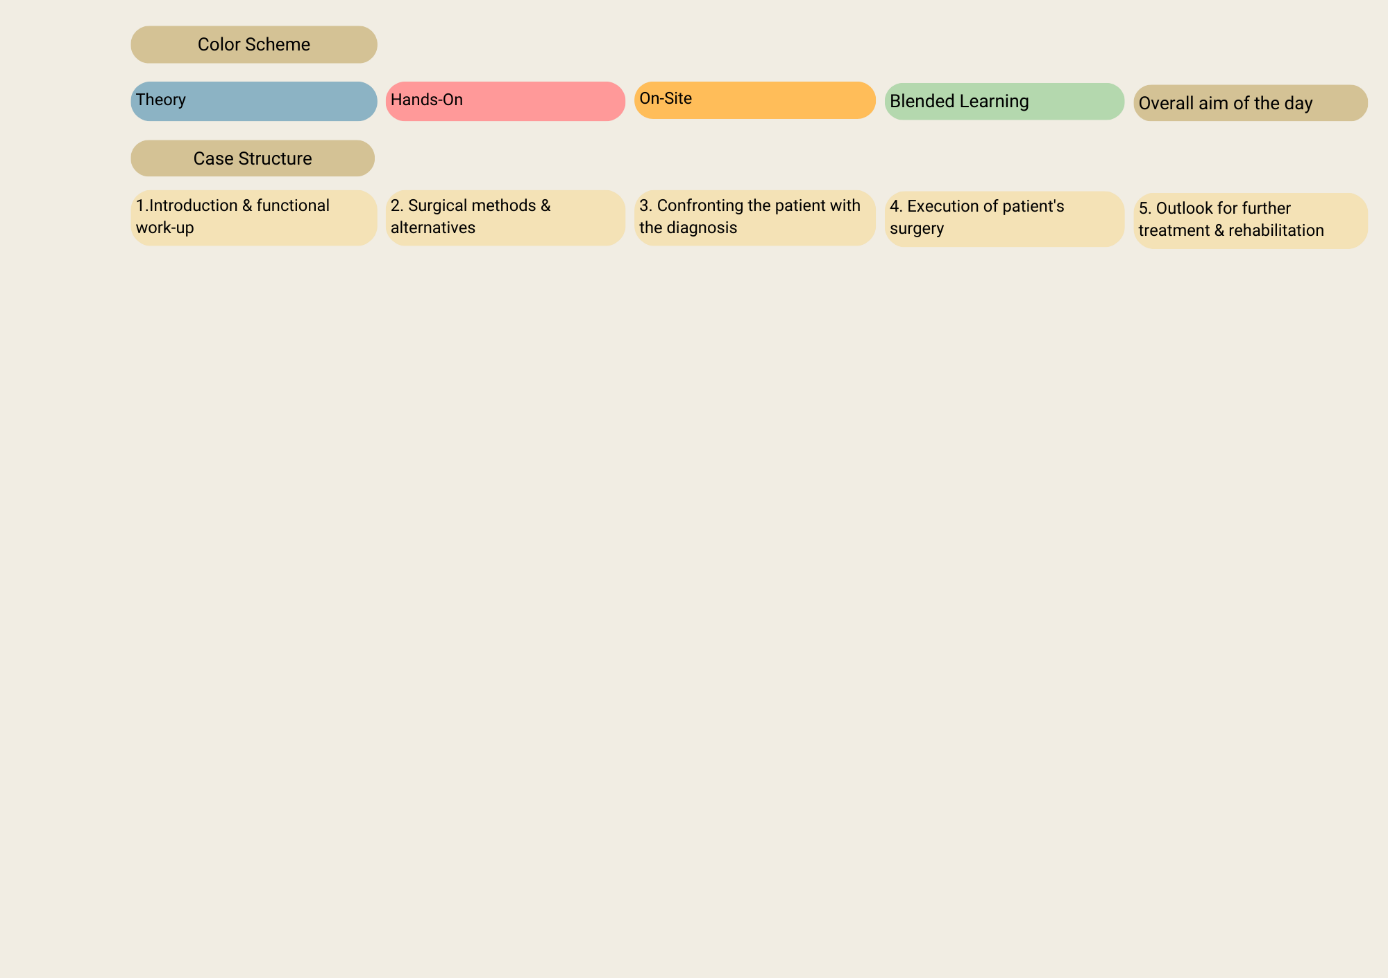
Supplementary Figure 3: Explanatory legend of the color scheme and the case structure.
